# Supplementary material
Source: Royal Society of Chemistry journal article supplement (doi:10.1039/d6qi00379f)
Supplement: d6qi00379f1.pdf [file d6qi00379f1.pdf]

## Supporting Information

### Monoclinic $\text{Er}^{3+}$ -doped $\text{Y}_2\text{O}_3$ Phosphor: Advancing Ratiometric Optical Temperature Sensing Beyond the Cubic Phase

Mikhail A. Kurochkin<sup>a</sup>, Anton I. Kostyukov<sup>b</sup>, Aleksandr A. Nashivochnikov<sup>b</sup>, Aleksey V. Zhuzhgov<sup>b</sup>, Svetlana V. Cherepanova<sup>b</sup>, Evgenii Yu. Kolesnikov<sup>c</sup>, Ilya E. Kolesnikov<sup>a,\*</sup>

<sup>a</sup> *St. Petersburg University, Universitetskaya nab. 7-9, 199034, St. Petersburg, Russia*

<sup>b</sup> *Boriskov Institute of Catalysis SB RAS, 5 Lavrentiev Ave., 630090 Novosibirsk, Russia*

<sup>c</sup> *Peter the Great St. Petersburg Polytechnic University, Polytechnicheskaya str. 29, 195251, St. Petersburg, Russia*

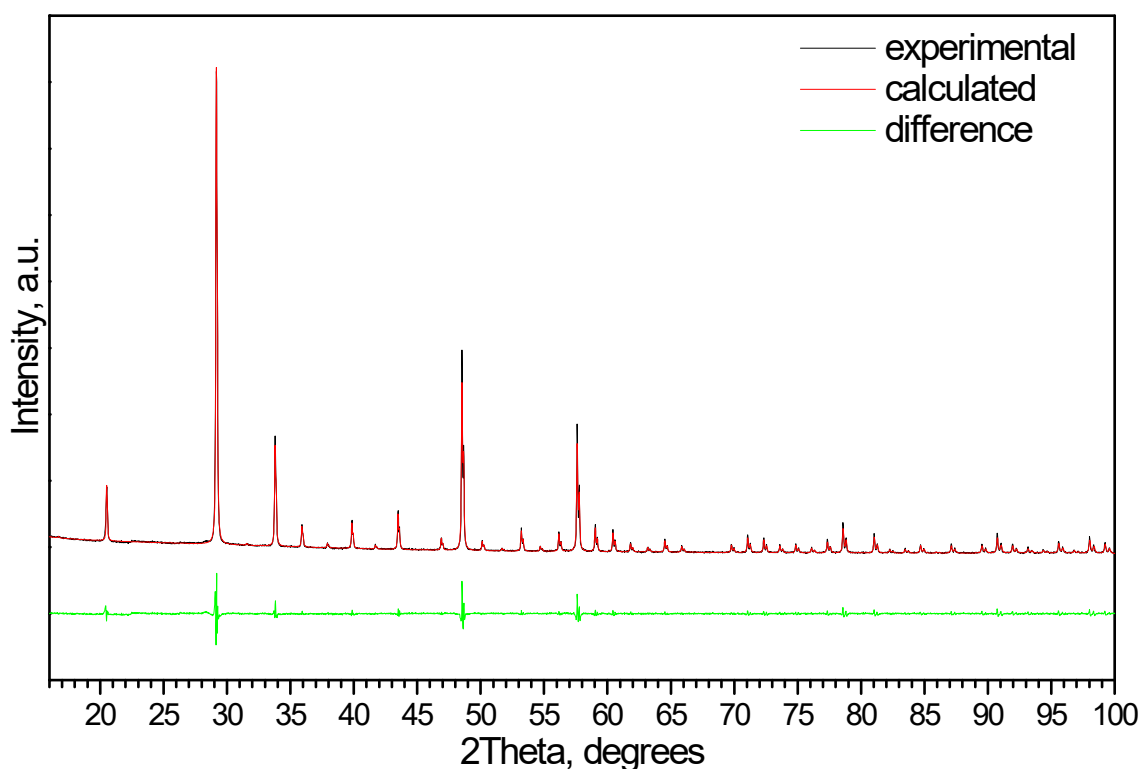

Figure S1. Rietveld analysis of XRD pattern of cubic  $\text{Y}_2\text{O}_3:\text{Er}^{3+}$  sample.

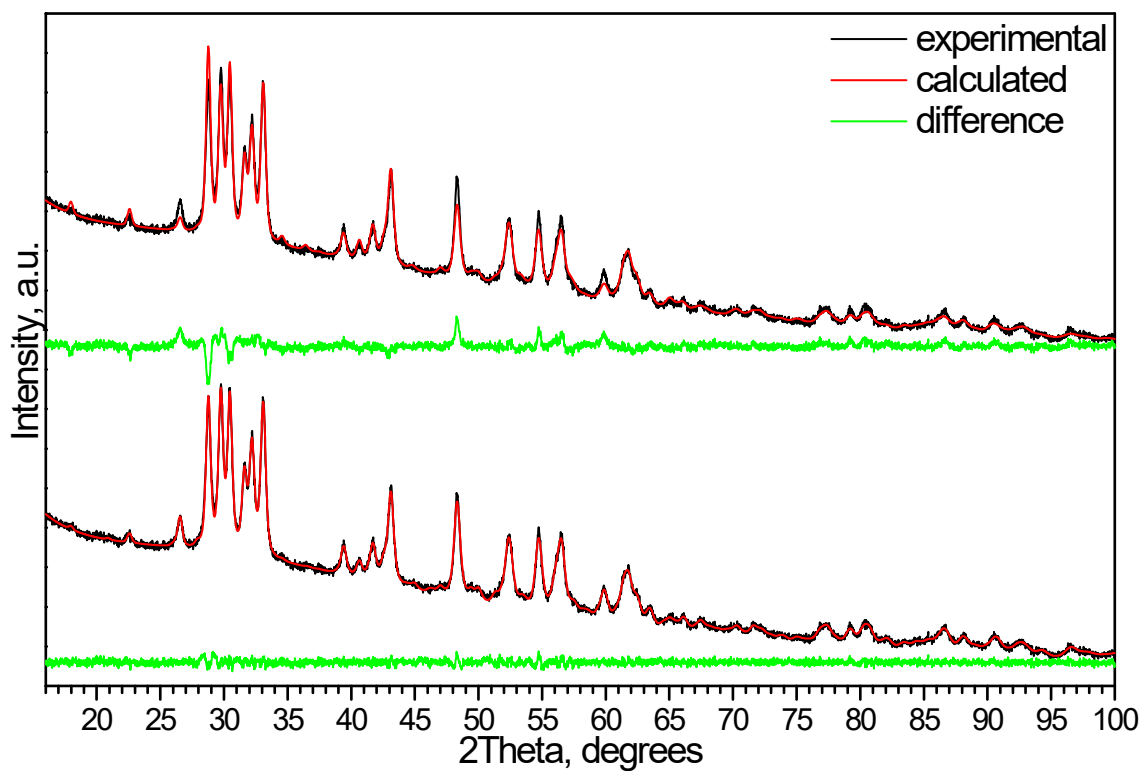

Figure S2. Rietveld analysis of XRD pattern of monoclinic  $\text{Y}_2\text{O}_3:\text{Er}^{3+}$  sample. Top and bottom: without and with refinement of occupancies of cationic positions.
